# Supplementary material for: Diagnostic accuracy of optic nerve sheath diameter on ultrasound for the detection of increased intracranial pressure in patients with traumatic brain injury: A systematic review and meta‑analysis
Source: PubMed Central journal article supplement — Biomed Rep. 2023 Oct 30;19(6):103. doi: 10.3892/br.2023.1685 (PMC10646761; doi:10.3892/br.2023.1685), 2023-10-30
Supplement: Supplementary_Data.pdf [file Supplementary_Data.pdf]

## Details of search strategy

### PubMed

# 1 'ultrasonography'[tw]  
# 2 'ultrasonic'[tw]  
# 3 'ultrasound'[tw]  
# 4 #1 OR #2 OR #3  
# 5 'optic nerve'[tw]  
# 6 'optic nerve sheath'[tw]  
# 7 'optic nerve sheath diameter'[tw]  
# 8 'ONSD'[tw]  
# 9 #5 OR #6 OR #7 OR #8  
#10 'intracranial pressure'[tw]  
#11 'raised intracranial pressure'[tw]  
#12 'high intracranial pressure'[tw]  
#13 'ICP'[tw]  
#14 'high ICP'[tw]  
#15 'raised ICP'[tw]  
#16 #10 OR #11 OR #12 OR #13 OR #14 OR #15  
#17 #4 AND #9 AND #16

### Embase

# 1 'ultrasonography'/exp OR ultrasonography  
# 2 'ultrasound'/exp OR ultrasound

# 3 'ultrasonic'/exp OR ultrasonic  
# 4 #1 OR #2 OR #3  
# 5 'optic nerve'/exp OR 'optic nerve'  
# 6 'optic nerve sheath'/exp OR 'optic nerve sheath'  
# 7 'optic nerve sheath diameter'/exp OR 'optic nerve sheath diameter'  
# 8 'ONSD'/exp OR ONSD  
# 9 #5 OR #6 OR #7 OR #8  
#10 'intracranial pressure'  
#11 'raised intracranial pressure'  
#12 'high intracranial pressure'  
#13 'ICP'  
#14 'high ICP'  
#15 'raised ICP'  
#16 #10 OR #11 OR #12 OR #13 OR #14 OR #15  
#17 #4 AND #9 AND #16

### Cochrane Register of Controlled Trials

#1 (ultrasound or ultrasonic or ultrasonography) and ('optic nerve' or 'optic nerve sheath' or 'optic nerve sheath diameter' or ONSD) and ('intracranial pressure' or 'raised intracranial pressure' or 'high intracranial pressure' or 'ICP' or 'high ICP' or 'raised ICP'): ti,ab,kw in Trials (Word variations have been searched)
